# Supplementary material for: Capacity to Consent in Healthcare: A Systematic Review and Meta-Analysis Comparing Patients with Bipolar Disorder and Schizophrenia Spectrum Disorder
Source: Preprints.org preprint supplement (doi:10.20944/preprints202404.0004.v1), 2024-04-01
Supplement: Supplementary file 1 [file supplementary]

**Tables S2**

Studies enrolling patients in a clinical remission status

**Understanding**

| **Study** | **No. of BD** | **No. of SZ** | **ES** | **Sig.** | **SE** | **W** | **95% CI** | 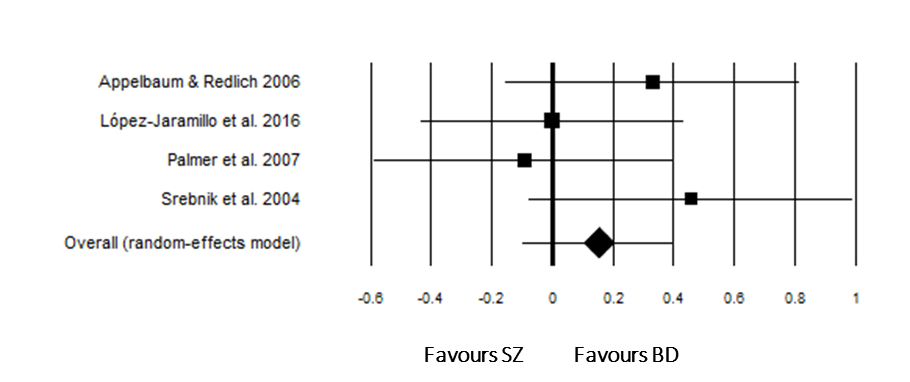 |
| --- | --- | --- | --- | --- | --- | --- | --- | --- |
| Appelbaum & Redlich 2006 | 22 | 63 | 0.33 | 0.180 | 0.25 | 24.88 | - 0.15, 0.81 |
| López-Jaramillo et al. 2016 | 40 | 40 | 0.00 | 1.000 | 0.22 | 30.34 | - 0.43, 0.43 |
| Palmer et al. 2007 | 31 | 31 | -0.09 | 0.708 | 0.25 | 24.11 | - 0.59, 0.40 |
| Srebnik et al. 2004 | 20 | 41 | 0.46 | 0.091 | 0.27 | 20.67 | - 0.07, 0.99 |
| Overall (random-effects model)* | 113 | 175 | 0.15 | 0.226 | 0.13 | 100 % | - 0.10, 0.41 |
| Heterogeneity: Q=3.24; df = 3 (p = 0.356); I² = 7.37; Tau² = 0.00 | | | | | | | |

**Appreciation**

| **Study** | **No. of BD** | **No. of SZ** | **ES** | **Sig.** | **SE** | **W** | **95% CI** | 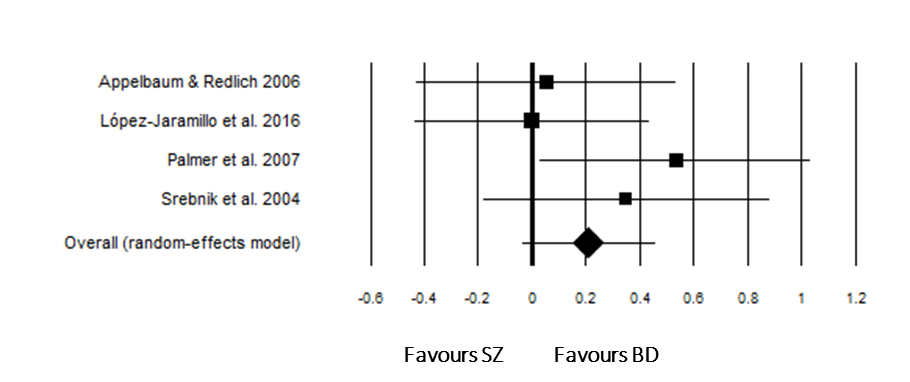 |
| --- | --- | --- | --- | --- | --- | --- | --- | --- |
| Appelbaum & Redlich 2006 | 22 | 63 | 0.05 | 0.823 | 0.25 | 25.20 % | - 0.43, 0.54 |
| López-Jaramillo et al. 2016 | 40 | 40 | 0.00 | 1.000 | 0.22 | 30.58 % | - 0.43, 0.43 |
| Palmer et al. 2007 | 31 | 31 | 0.53 | 0.037 | 0.26 | 23.38 % | 0.03, 1.03 |
| Srebnik et al. 2004 | 20 | 41 | 0.35 | 0.195 | 0.27 | 20.85 % | - 0.18, 0.88 |
| Overall (random-effects model)* | 113 | 175 | 0.21 | 0.095 | 0.13 | 100 % | - 0.04, 0.46 |
| Heterogeneity: Q=3.17; df = 3 (p = 0.367); I² = 5.27%; Tau² = 0.00 | | | | | | | |

**Reasoning**

| **Study** | **No. of BD** | **No. of SZ** | **ES** | **Sig.** | **SE** | **W** | **95% CI** | 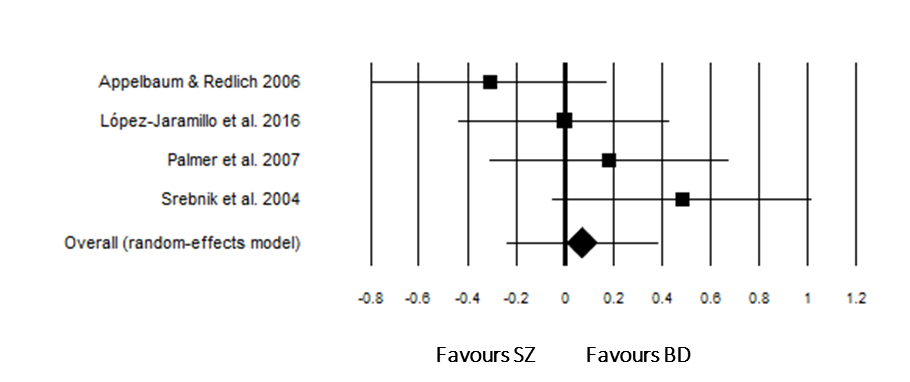 |
| --- | --- | --- | --- | --- | --- | --- | --- | --- |
| Appelbaum & Redlich 2006 | 22 | 63 | - 0.31 | 0.215 | 0.25 | 25.07 % | - 0.79, 0.18 |
| López-Jaramillo et al. 2016 | 40 | 40 | 0.00 | 1.000 | 0.22 | 28.36 % | - 0.43, 0.43 |
| Palmer et al. 2007 | 31 | 31 | 0.18 | 0.462 | 0.25 | 24.49 % | - 0.31, 0.68 |
| Srebnik et al. 2004 | 20 | 41 | 0.49 | 0.074 | 0.27 | 22.08 % | - 0.05, 1.02 |
| Overall (random-effects model)* | 113 | 175 | 0.08 | 0.632 | 0.16 | 100 % | - 0.24, 0.39 |
| Heterogeneity: Q=4.98; df = 3 (p = 0.173); I² = 39.79%; Tau² = 0.04 | | | | | | | |

**Expression of a Choice**

| **Study** | **No. of BD** | **No. of SZ** | **ES** | **Sig.** | **SE** | **95% CI** | 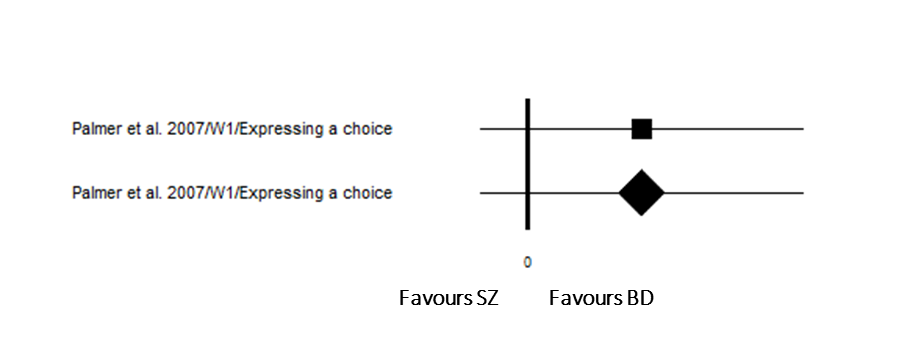 |
| --- | --- | --- | --- | --- | --- | --- | --- |
| Palmer et al. 2007 | 31 | 31 | 0.35 | 0.167 | 0.25 | - 0.15, 0.84 |
